# Supplementary figures and images for: Importance of Tissue Doppler Evaluation in Dilated Cardiomyopathy: The Value of Diastolic Filling Pattern as a Prognostic Predictor
Source: MDPI journal article supplement (doi:10.3390/jcdd10060237), 2023-05-28

Figure 1 Supplemental. Flowchart regarding inclusion-exclusion criteria

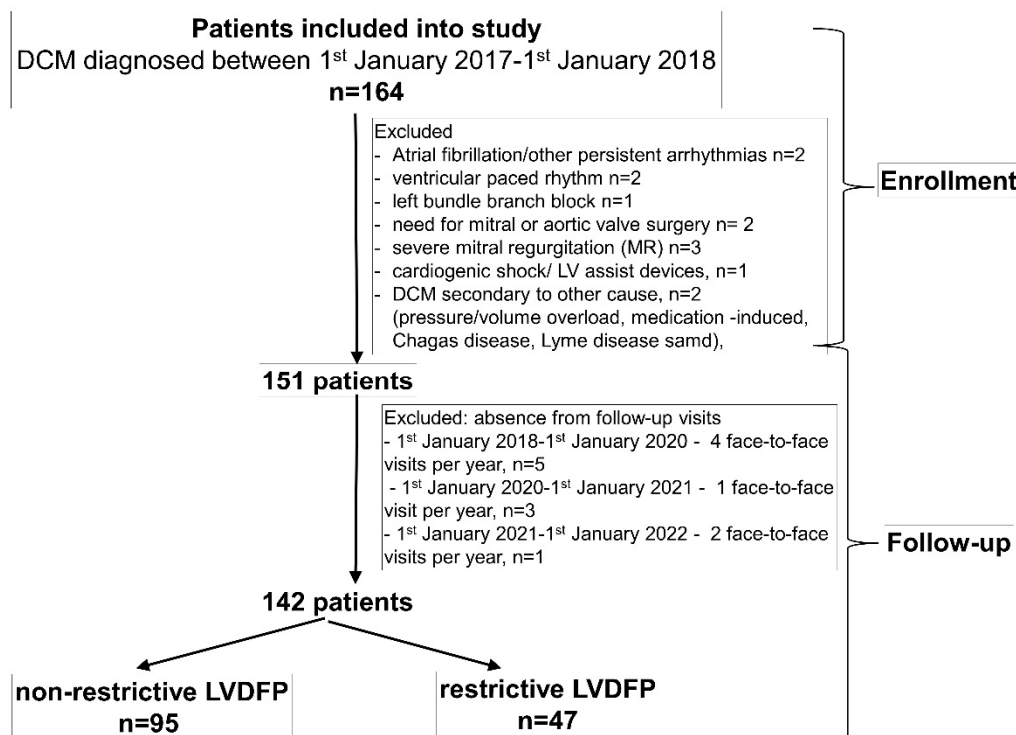

Supplement: s1 [file s1]
